# Supplementary material
Source: Springer Nature journal article supplement (https://www.springermedizin.de/resource/supplementary/13229_2011_28_MOESM4_ESM.pdf/9676002)

Ln IFN-gamma (pg/ml)

Mothers of AU

Mothers of GP

Mothers of DD

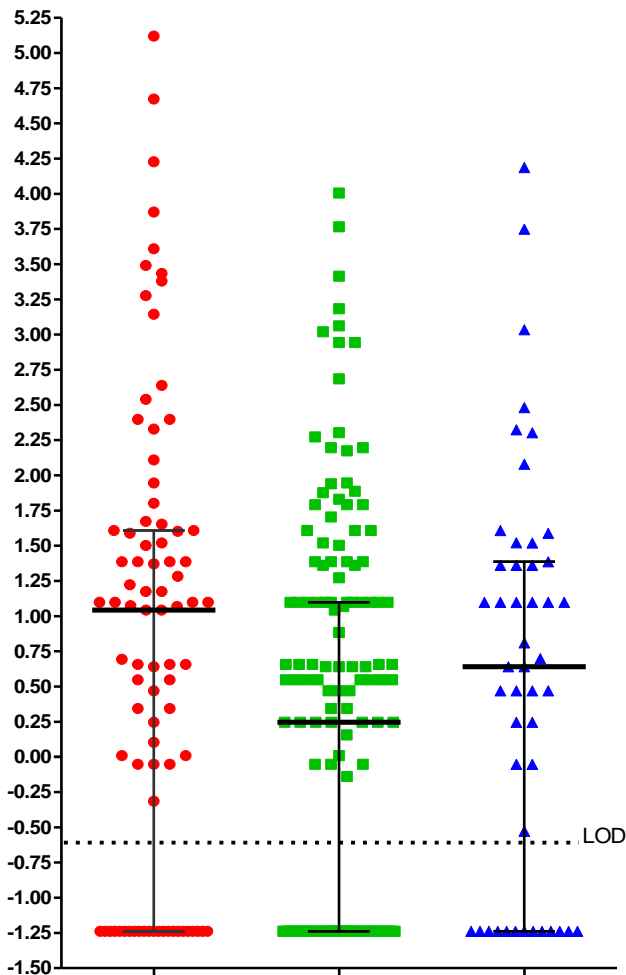

Supplement: MOESM4 [file 9676002]
